# Supplementary material for: Loss of c-Met Disrupts Gene Expression Program Required for G2/M Progression during Liver Regeneration in Mice
Source: PubMed Central journal article supplement (PMC2940888; doi:10.1371/journal.pone.0012739), 2010-09-16

Fig. S3

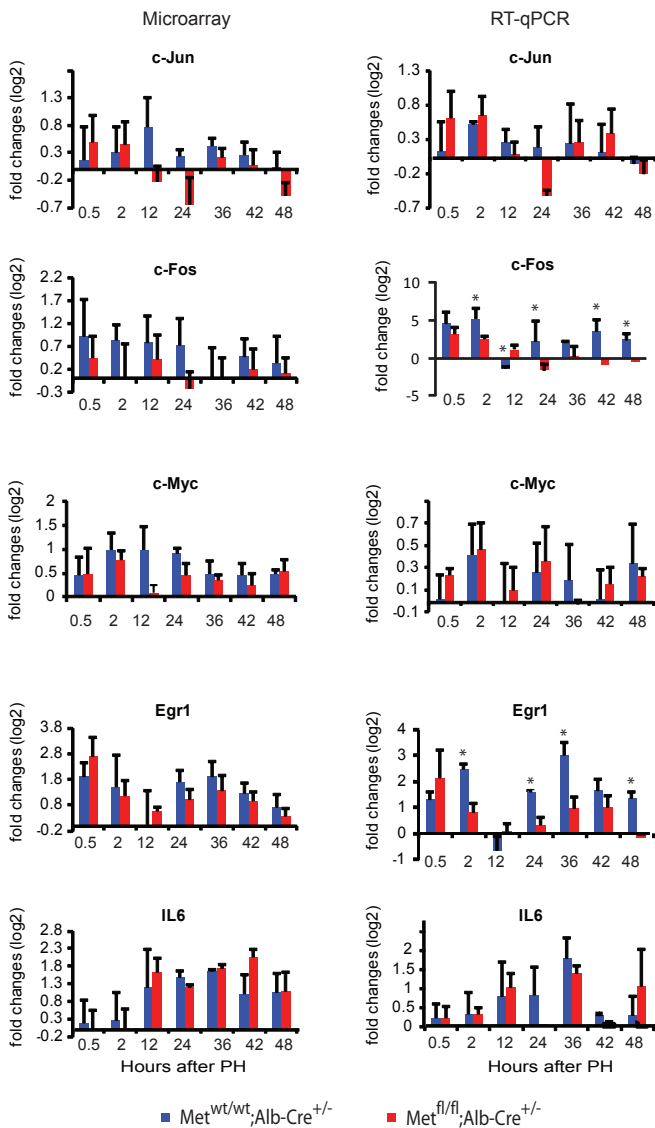

Supplement: pone.0012739.s003.pdf [file pone.0012739.s003.pdf]
